# Supplementary material for: Genome-Wide Identification and Expression Patterns of AcSWEET Family in Pineapple and AcSWEET11 Mediated Sugar Accumulation
Source: MDPI journal article supplement (doi:10.3390/ijms232213875), 2022-11-10
Supplement: s1 [file s1]

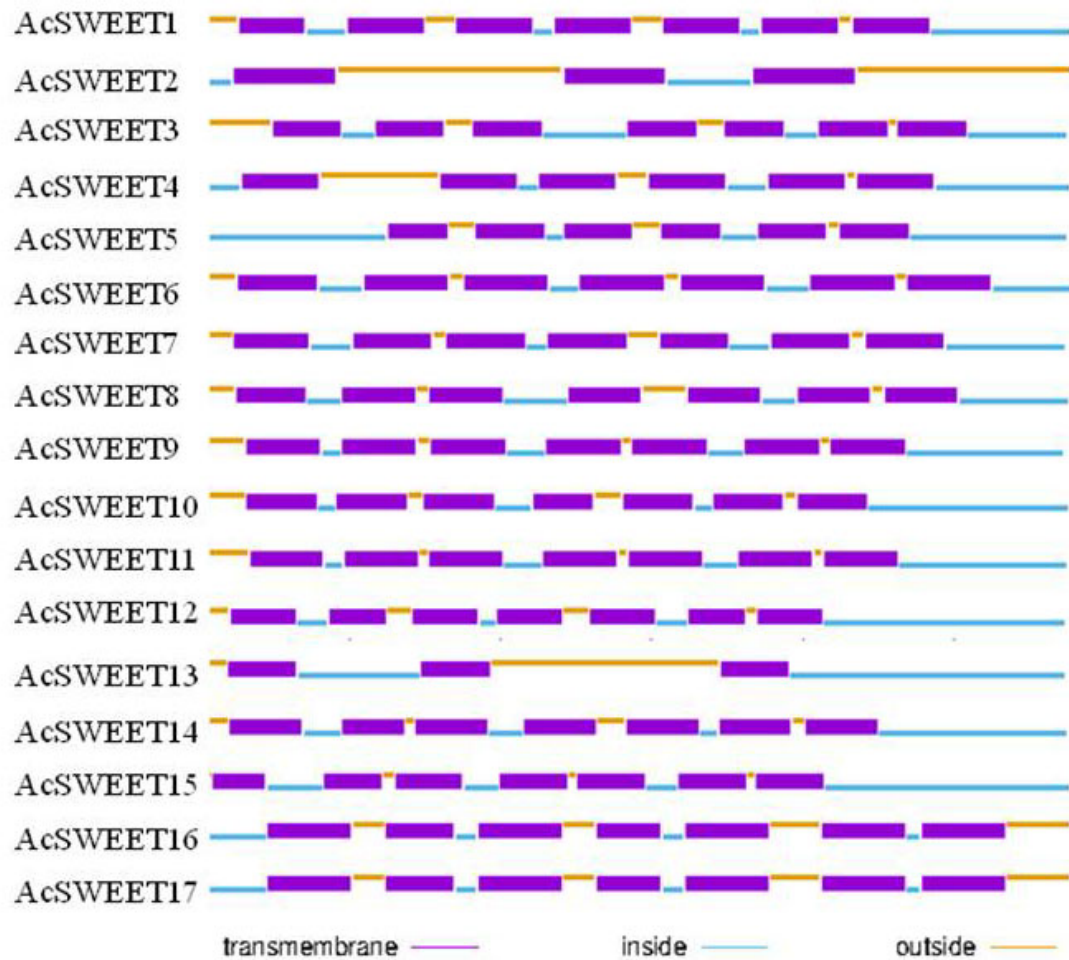

**Figure S1.** Protein structure of AcSWEETs in pineapple. The blue lines means the intracellular region, the purple lines indicate transmembrane, the yellow lines denotes extracellular.

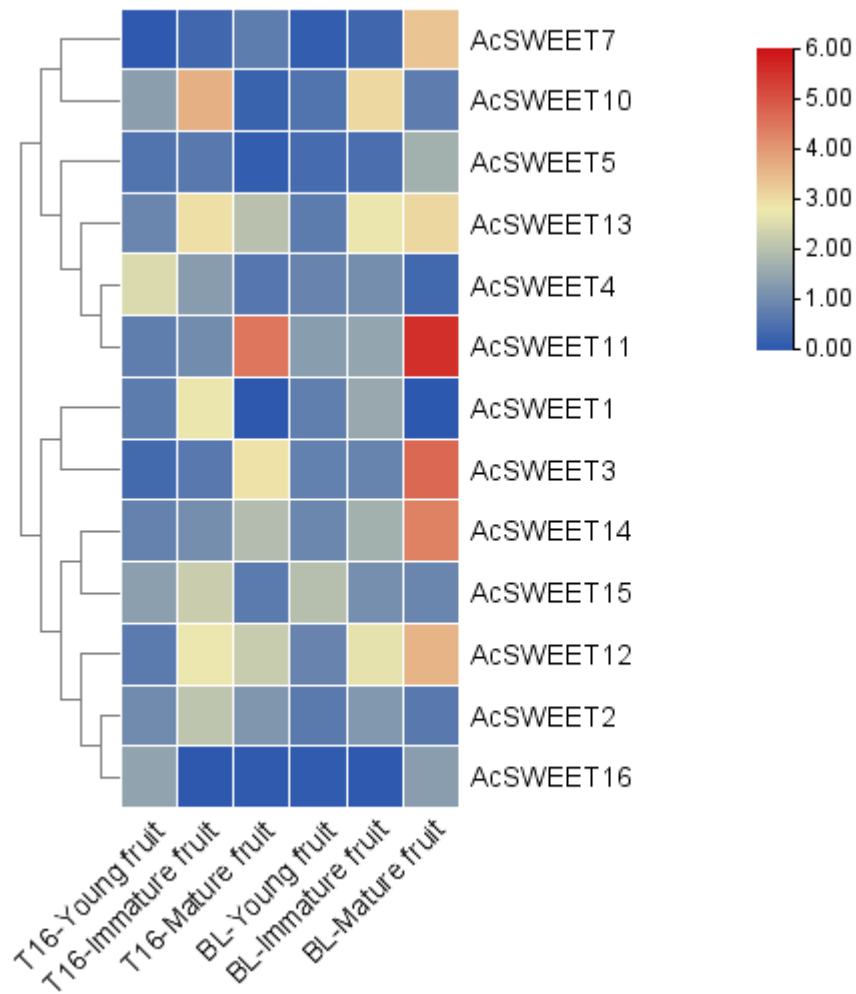

**Figure S2.** Expression analysis of *AcSWEETs* in pineapple fruit development of 'Tainong16' and 'Comte de paris'. T16, 'Tainong16', BL, 'Comte de paris'.

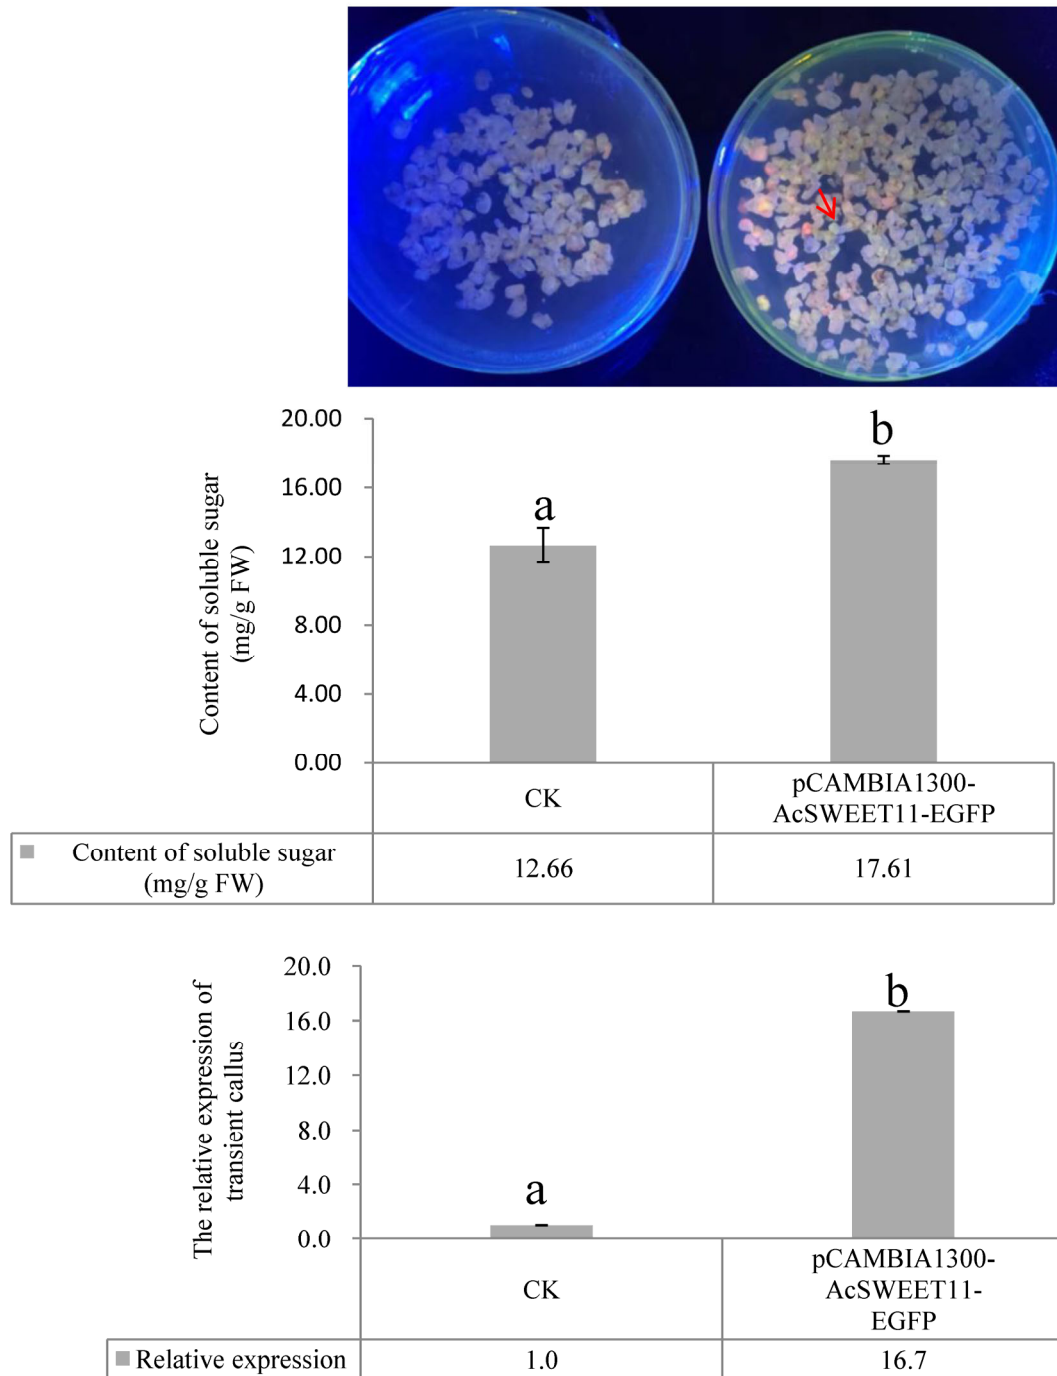

**Figure S3.** Soluble sugar content of pineapple embryogenic callus by agrobacterium-mediated vacuum infiltration. Arrow marked the callus of transient transfection with GFP. Different letters denoted significant difference with one-way ANOVA test by Tukey's test ( $p < 0.05$ ).
